# Supplementary material for: A Decade of Cave Drip Hydrographs Shows Spatial and Temporal Variability in Epikarst Storage and Recharge to Appalachian Karst Systems
Source: MDPI journal article supplement (doi:10.3390/hydrology9080131), 2022-07-25
Supplement: s1 [file s1]

Groce-Wright et al. "A decade of cave drip hydrographs shows spatial and temporal variability in epikarst storage and recharge to Appalachian karst systems"

Supplementary Materials

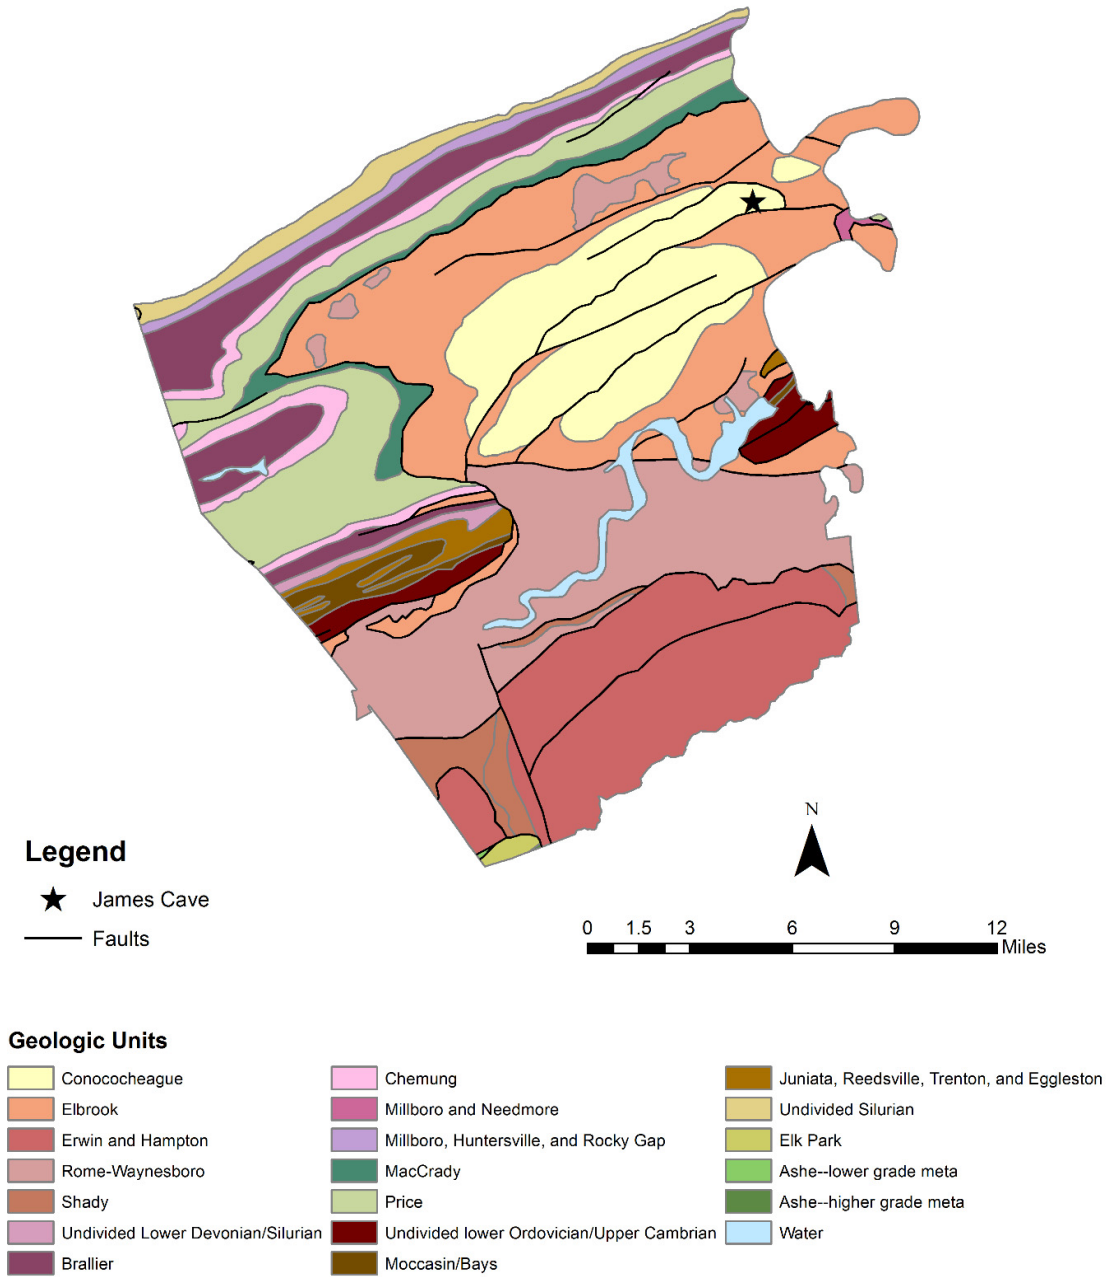

**Figure S1.** Geologic map of Pulaski County, Virginia USA with location of James Cave noted. Modified from [41].

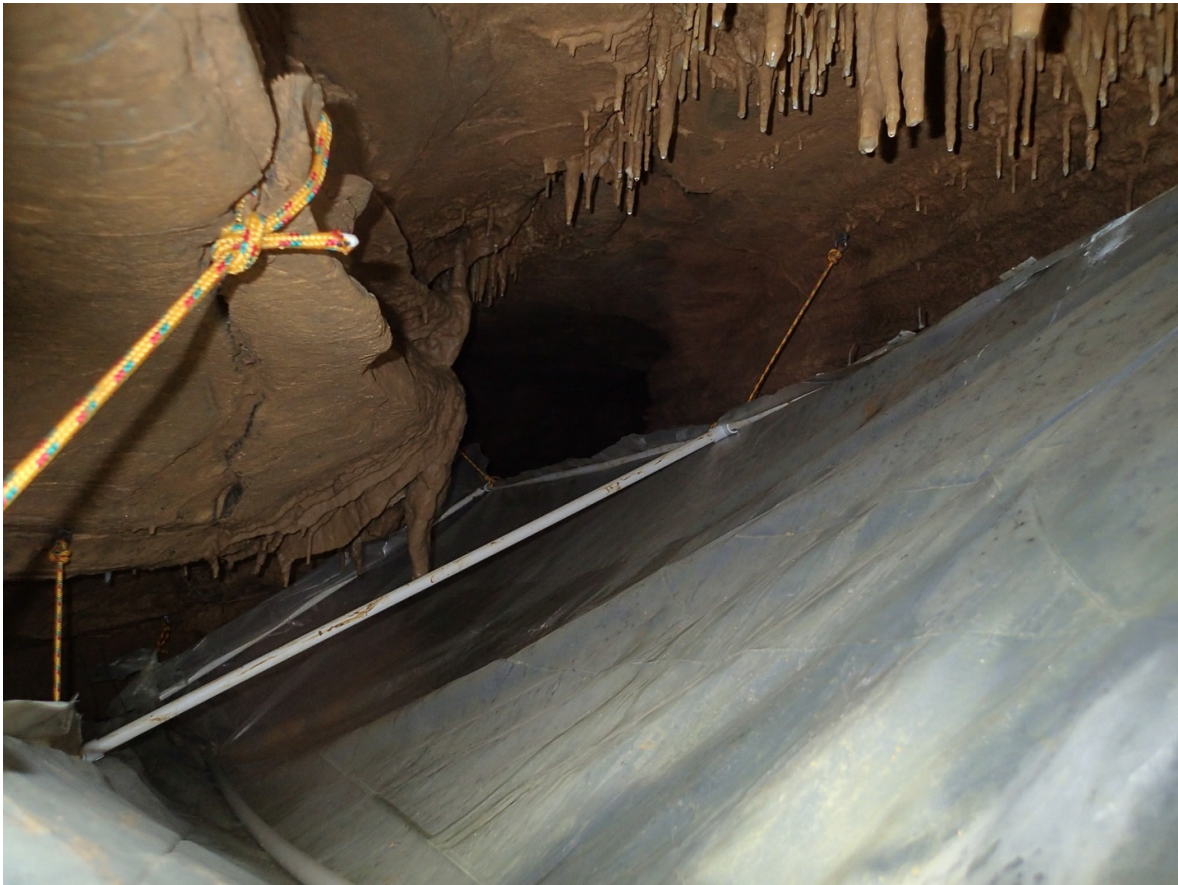

**Figure S2.** Photo of drip tarp set-up at MS2. Photo credit: Sarah Eagle.

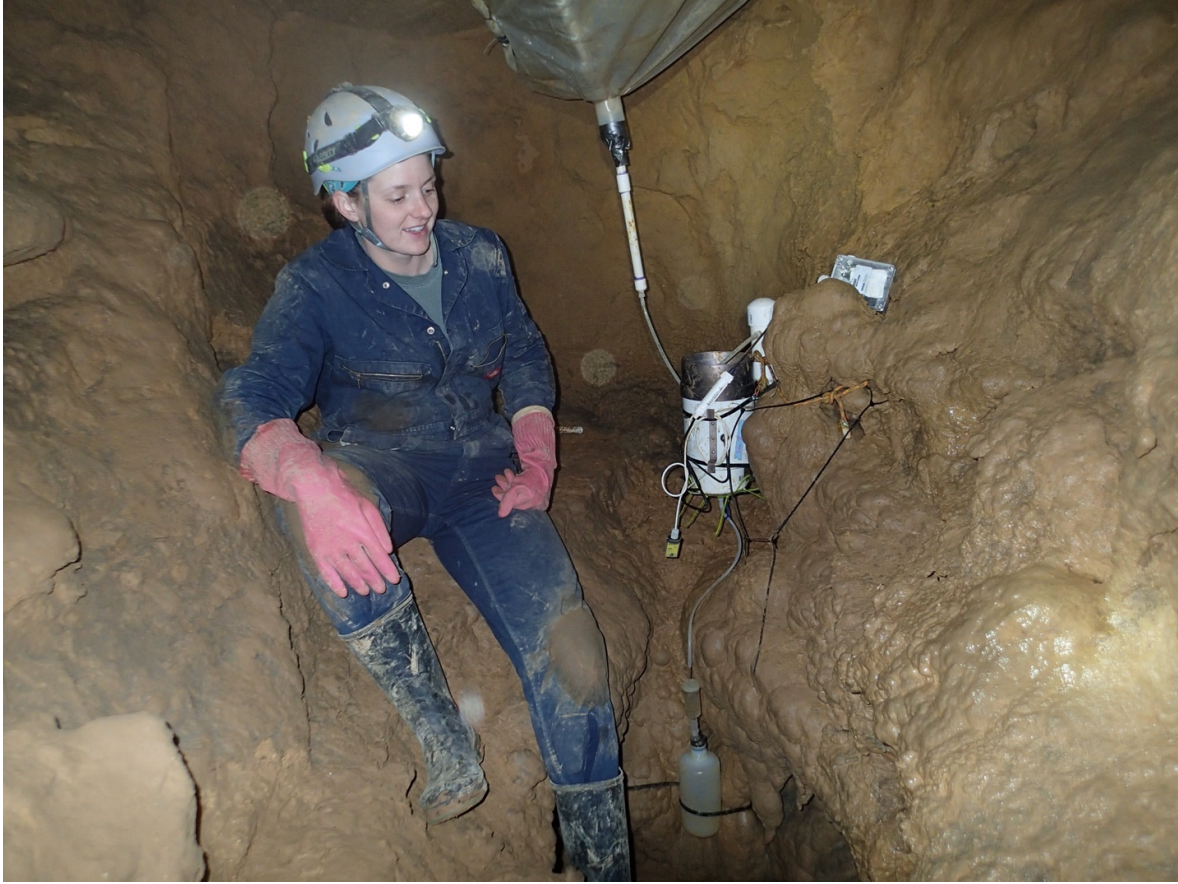

**Figure S3.** Photo of rain gain gauge recording drips channeled from drip tarp. Photo credit: Matthew Blower.
